# Supplementary material for: Hexadecanuclear isobutyrate nanoclusters with a {CoII14CoIII2} core
Source: Royal Society of Chemistry journal article supplement (doi:10.1039/d4ce00637b), 2024-01-01
Supplement: d4ce00637b1.pdf [file d4ce00637b1.pdf]

## ELECTRONIC SUPPLEMENTARY INFORMATION

### Hexadecanuclear isobutyrate nanoclusters with a $\{\text{Co}^{\text{II}}_{14}\text{Co}^{\text{III}}_2\}$ core

*Dumitru Stati,<sup>a</sup> Jan van Leusen,<sup>b</sup> Victor Ch. Kravtsov,<sup>a</sup> Karl Krämer,<sup>c</sup> Shi-Xia Liu,<sup>c</sup> Silvio Decurtins,<sup>c</sup> Paul Kögerler<sup>b</sup> and Svetlana G. Baca<sup>\*a</sup>*

<sup>a</sup>Institute of Applied Physics, Moldova State University, Academiei str. 5,  
MD2028 Chisinau, R. Moldova

<sup>b</sup>Institute of Inorganic Chemistry, RWTH Aachen University, Landoltweg 1,  
52074 Aachen, Germany

<sup>c</sup>Department of Chemistry, Biochemistry and Pharmaceutical Sciences, W.  
Inäbnit Laboratory for molecular quantum materials, University of Bern, CH-  
3012 Bern, Switzerland

#### Corresponding Author:

\* S.G.B. E-mail: [svetlana.baca@ifa.usm.md](mailto:svetlana.baca@ifa.usm.md); [sbaca\\_md@yahoo.com](mailto:sbaca_md@yahoo.com)

|                                                                                                                                  |     |
|----------------------------------------------------------------------------------------------------------------------------------|-----|
| <b>Table S1.</b> Coordination compounds with a {Co <sub>16</sub> } core.....                                                     | 3-4 |
| <b>Table S2.</b> Crystallographic data and structure refinement parameters for <b>1-2</b> .....                                  | 5   |
| <b>Table S3.</b> Selected bond distances (in Å) for <b>1-2</b> .....                                                             | 6-7 |
| <b>Table S4.</b> Hydrogen bonds geometry (Å, deg) for <b>1-2</b> .....                                                           | 7   |
| <b>Table S5.</b> BVS calculations for Co atoms in <b>1-2</b> .....                                                               | 8   |
| <b>Table S6.</b> Hirshfeld surfaces for the Co(II) and Co(III) centers in <b>1</b> .....                                         | 9   |
| <b>Table S7.</b> Hirshfeld surfaces for the Co(II) and Co(III) centers in <b>2</b> .....                                         | 10  |
| <b>Table S8.</b> Quantitative data from Hirshfeld surface of the of the Co(II) and Co(III) centers in <b>1-2</b> .....           | 11  |
| <b>Figure S1.</b> IR spectrum of <b>1</b> .....                                                                                  | 12  |
| <b>Figure S2.</b> IR spectrum of <b>2</b> .....                                                                                  | 12  |
| <b>Figure S3.</b> TGA/DSC curves for <b>1</b> .....                                                                              | 13  |
| <b>Figure S4.</b> TGA/DTG curves for <b>2</b> .....                                                                              | 13  |
| <b>Figure S5.</b> PRDX analysis of <b>1</b> .....                                                                                | 14  |
| <b>Figure S6.</b> PRDX analysis of <b>2</b> .....                                                                                | 14  |
| <b>Figure S7.</b> Experimental and simulated (insert) isotope patterns for <b>1</b> .....                                        | 15  |
| <b>Figure S8.</b> Asymmetric unit of nanocluster <b>1</b> .....                                                                  | 16  |
| <b>Figure S9.</b> Asymmetric unit of nanocluster <b>2</b> .....                                                                  | 16  |
| <b>Figure S10.</b> View of the Hirshfeld surface for nanocluster in <b>1</b> .....                                               | 17  |
| <b>Figure S11.</b> View of the Hirshfeld surface nanocluster in <b>2</b> .....                                                   | 18  |
| <b>Figure S12.</b> 2D fingerprint plots and $d_{\text{norm}}$ surface plots of the {Co <sub>16</sub> } cluster in <b>2</b> ..... | 19  |
| <b>Figure S13.</b> Hirshfeld surfaces for the Co(III) and Co(II) centres presenting different shapes in <b>1</b> .....           | 20  |
| <b>Figure S14.</b> Hirshfeld surfaces for the Co(III) and Co(II) centres presenting different shapes in <b>2</b> .....           | 21  |

**Table S1. Coordination compounds with a {Co<sub>16</sub>} core**

|    | <b>Cod</b>         | <b>Core</b>                                                     | <b>Topology</b>                   | <b>Properties</b>                                                            | <b>References</b>                                                                                                                                                                                                             |
|----|--------------------|-----------------------------------------------------------------|-----------------------------------|------------------------------------------------------------------------------|-------------------------------------------------------------------------------------------------------------------------------------------------------------------------------------------------------------------------------|
| 1  | AQOLOK<br>AQOLOK01 | {Co <sup>II</sup> <sub>8</sub> Co <sup>III</sup> <sub>8</sub> } | Metallocages                      | Photocatalyst                                                                | Y. Jin, H. Jiang, X. Tang, W. Zhang, Y. Liu, Y. Cui, <i>Dalton Trans.</i> <b>2021</b> , 50,8533. <a href="https://doi.org/10.1039/D1DT00652E">https://doi.org/10.1039/D1DT00652E</a>                                          |
| 2  | CIHFOQ             | {Co <sup>II</sup> <sub>16</sub> }                               | Face-centered cube with two wings | Antiferromagnetic Co <sup>II</sup> ...Co <sup>II</sup> exchange interactions | Y. Cao, Y. Chen, L. Li, D. Gao, W. Liu, H. Hu, W. Li, Y. Li, <i>Dalton Trans.</i> , <b>2013</b> , 42, 10912, <a href="https://doi.org/10.1039/C3DT51140E">https://doi.org/10.1039/C3DT51140E</a>                              |
| 3  | EGAHEC             | {Co <sup>II</sup> <sub>16</sub> }                               | Metallocages                      | High-performance proton-conductive materials                                 | T.-T. Guo, D.-M. Cheng, J. Yang, X. Xu, J.-F. Ma, <i>Chem. Commun.</i> , <b>2019</b> , 55, 6277, <a href="https://doi.org/10.1039/C9CC01828J">https://doi.org/10.1039/C9CC01828J</a>                                          |
| 4  | EGAHIG             |                                                                 |                                   |                                                                              |                                                                                                                                                                                                                               |
| 5  | EKIJAK             | {Co <sup>II</sup> <sub>16</sub> }                               | Wheel-like phosphonate cluster    | Magnetic properties: frequency-dependent out-of-phase signals below 3 K      | Y.-Sh. Ma, Y. Song, X.-Y. Tang, R.-X. Yuan, <i>Dalton Trans.</i> , <b>2010</b> , 39, 6262, <a href="https://doi.org/10.1039/B923494B">https://doi.org/10.1039/B923494B</a>                                                    |
| 6  | EQOBAQ             | {Co <sup>II</sup> <sub>16</sub> }                               | Metallocages                      | Highly soluble cages                                                         | M. R. Dworzak, M. M. Deegan, G. P. A. Yap, E. D. Bloch, <i>Inorg. Chem.</i> , <b>2021</b> , 60, 5607, <a href="https://doi.org/10.1021/acs.inorgchem.0c03554">https://doi.org/10.1021/acs.inorgchem.0c03554</a>               |
| 7  | GETFOD             | {Co <sup>II</sup> <sub>16</sub> }                               | Metallocages                      | Antiferromagnetic Co <sup>II</sup> ...Co <sup>II</sup> exchange interactions | X. Zhu, Sh. Wang, H. Han, X. Hang, W. Xie, W. Liao, <i>Cryst. Growth Des.</i> , <b>2018</b> , 18, 225, <a href="https://doi.org/10.1021/acs.cgd.7b01127">https://doi.org/10.1021/acs.cgd.7b01127</a>                          |
| 8  | HASSIH             | {Co <sup>II</sup> <sub>16</sub> }                               | Metallocages                      |                                                                              | G. Zhang, H. Han, K. Li, H. Zhang, W. Liao, <i>Zeitschrift fur Naturforschung, B: Chemical Sciences</i> , <b>2021</b> , 76, 827, <a href="https://doi.org/10.1515/znb-2021-0138">https://doi.org/10.1515/znb-2021-0138</a>    |
| 9  | HASSON             |                                                                 |                                   |                                                                              |                                                                                                                                                                                                                               |
| 10 | HIPHOF             | {Co <sup>II</sup> <sub>16</sub> }                               | Metallocages                      | Cavity-specific binding properties in both solid state and solution          | F.-R. Dai, D. C. Becht, Zh. Wang, <i>Chem. Commun.</i> , <b>2014</b> , 50, 5385, <a href="https://doi.org/10.1039/C3CC47420H">https://doi.org/10.1039/C3CC47420H</a>                                                          |
| 11 | HITGOH             | {Co <sup>II</sup> <sub>16</sub> }                               | “Clusters of clusters”            |                                                                              | M. Rodriguez-Zubiri, V. Gallo, J. Rose, R. Welter, P. Braunstein, <i>Chem. Commun.</i> , <b>2008</b> , 64, <a href="https://doi.org/10.1039/B713540H">https://doi.org/10.1039/B713540H</a>                                    |
| 12 | JIGSOK             | {Co <sup>II</sup> <sub>16</sub> }                               | Metallocages                      | Proton receptor                                                              | Ch.-Zh. Sun, L.-J. Cheng, Y. Qiao, L.-Y. Zhang, Zh.-N. Chen, F.-R. Dai, W. Lin, Zh. Wang, <i>Dalton Trans.</i> , <b>2018</b> , 47, 10256, <a href="https://doi.org/10.1039/C8DT01900B">https://doi.org/10.1039/C8DT01900B</a> |
| 13 | KULNIP             | {Co <sup>II</sup> <sub>16</sub> }                               | Metallocages                      |                                                                              | J. Liu, A. Wei, <i>Chem. Commun.</i> , <b>2009</b> , 4254, <a href="https://doi.org/10.1039/B903954F">https://doi.org/10.1039/B903954F</a>                                                                                    |
| 14 | LINQOS             | {Co <sup>II</sup> <sub>16</sub> }                               | Metallocages                      |                                                                              | M. R. Dworzak, Ch. M. Montone, N. I. Halaszynski, G. P. A. Yap,                                                                                                                                                               |

|    |        |                                   |                                                                 |                                                                                     |                                                                                                                                                                                                                                        |
|----|--------|-----------------------------------|-----------------------------------------------------------------|-------------------------------------------------------------------------------------|----------------------------------------------------------------------------------------------------------------------------------------------------------------------------------------------------------------------------------------|
| 15 | LINQUY |                                   |                                                                 |                                                                                     | Ch. J. Kloxin, E. D. Bloch, <i>Chem. Commun.</i> , <b>2023</b> , 59, 8977. <a href="https://doi.org/10.1039/D3CC02015K">https://doi.org/10.1039/D3CC02015K</a>                                                                         |
| 16 | MUBSUX | {Co <sup>II</sup> <sub>16</sub> } | Metallocages                                                    |                                                                                     | D. Eisler, W. Hong, M. C. Jennings, R. J. Puddephatt, <i>Organometallics</i> , <b>2002</b> , 21, 3955, <a href="https://doi.org/10.1021/om020394y">https://doi.org/10.1021/om020394y</a>                                               |
| 17 | NESYAP | {Co <sup>II</sup> <sub>16</sub> } | Wheel-like cluster                                              | Weak ferromagnetic nearest neighbour exchange interactions                          | P. A. Tsami, T. G. Tziotzi, A. B. Canaj, M. K. Singh, S. J. Dalgarno, E. K. Brechin, C. J. Milios, <i>Dalton Trans.</i> , <b>2022</b> , 51, 15128, <a href="https://doi.org/10.1039/D2DT02554J">https://doi.org/10.1039/D2DT02554J</a> |
| 18 | PEFXEF | {Co <sup>II</sup> <sub>16</sub> } | Metallocages                                                    | Strong antiferromagnetic Co <sup>II</sup> ...Co <sup>II</sup> exchange interactions | K. Xiong, F. Jiang, Y. Gai, Zh. He, D. Yuan, L. Chen, K. Su, M. Hong, <i>Cryst. Growth Des.</i> , <b>2012</b> , 12, 3335, <a href="https://doi.org/10.1021/cg300483c">https://doi.org/10.1021/cg300483c</a>                            |
| 19 | PEZCIK | {Co <sup>II</sup> <sub>16</sub> } | Metallocages                                                    |                                                                                     | X. Hang, X. Wang, M. Wang, M. Chen, Y. Bi, <i>Inorg. Chem. Frontiers</i> , <b>2022</b> , 10, 926, <a href="https://doi.org/10.1039/D2QI01885C">https://doi.org/10.1039/D2QI01885C</a>                                                  |
| 20 | RAFDAH | {Co <sup>II</sup> <sub>16</sub> } | Metallocages based on calixarene derivatives                    | Proton-conducting material                                                          | G. Zhang, M. Wei, H. Zang, H. Zhang, W. Liao, <i>Inorg. Chim. Acta</i> , <b>2021</b> , 514, 120027, <a href="https://doi.org/10.1016/j.ica.2020.120027">https://doi.org/10.1016/j.ica.2020.120027</a>                                  |
| 21 | RAFDEL |                                   |                                                                 |                                                                                     |                                                                                                                                                                                                                                        |
| 22 | SAQSEK | {Co <sup>II</sup> <sub>16</sub> } | Square-shape metallomacrocyclic based on polytriazolate ligands | Dominant antiferromagnetic interactions within the cluster.                         | W.-Q. Lin, J.-D. Leng, M.-L. Tong, <i>Chem. Commun.</i> , <b>2012</b> , 48, 4477, <a href="https://doi.org/10.1039/C2CC31141K">https://doi.org/10.1039/C2CC31141K</a>                                                                  |
| 23 | TAKCIU | {Co <sup>II</sup> <sub>16</sub> } | Metallocages based on calixarene derivatives                    | Adsorption properties                                                               | X. Hang, Sh. Wang, X. Zhu, H. Han, W. Liao, <i>CrystEngComm</i> , <b>2016</b> , 18, 4938, <a href="https://doi.org/10.1039/C6CE00028B">https://doi.org/10.1039/C6CE00028B</a>                                                          |
| 24 | TAKCOA |                                   |                                                                 |                                                                                     |                                                                                                                                                                                                                                        |
| 25 | TAKCUG |                                   |                                                                 |                                                                                     |                                                                                                                                                                                                                                        |
| 26 | TAKDAN |                                   |                                                                 |                                                                                     |                                                                                                                                                                                                                                        |
| 27 | TIYNAS | {Co <sup>II</sup> <sub>16</sub> } | Wheel-shaped cluster                                            | Ferromagnetic cubes antiferromagnetically coupled to the squares within the cluster | Y.-Q. Hu, M.-H. Zeng, K. Zhang, Sh. Hu, F.-F. Zhou, M. Kurmoo, <i>J. Am. Chem. Soc.</i> , <b>2013</b> , 135, 7901, <a href="https://doi.org/10.1021/ja3123784">https://doi.org/10.1021/ja3123784</a>                                   |
| 28 | WEBZIO | {Co <sup>II</sup> <sub>16</sub> } | Metallocages based on calixarene derivatives                    | Adsorption properties                                                               | M. Liu, W. Liao, <i>CrystEngComm</i> , <b>2012</b> , 14, 5727, <a href="https://doi.org/10.1039/C2CE25692D">https://doi.org/10.1039/C2CE25692D</a>                                                                                     |
| 29 | WEBZOU |                                   |                                                                 |                                                                                     |                                                                                                                                                                                                                                        |
| 30 | WIZZIQ | {Co <sup>II</sup> <sub>16</sub> } | Metallocages based on calixarene derivatives                    | Antiferromagnetic Co <sup>II</sup> ...Co <sup>II</sup> exchange interactions        | M. Liu, Sh. Du, Y. Bi, W. Liao, <i>Inorg. Chem. Commun.</i> , <b>2014</b> , 41, 96, <a href="https://doi.org/10.1016/j.inoche.2014.01.009">https://doi.org/10.1016/j.inoche.2014.01.009</a>                                            |
| 31 | YEHVOZ | {Co <sup>II</sup> <sub>16</sub> } | Metallocages based on calixarene derivatives                    | Adsorption properties                                                               | G. Zhang, X. Zhu, M. Liu, W. Liao, <i>J. Mol. Struct.</i> , <b>2018</b> , 1151, 29, <a href="https://doi.org/10.1016/j.molstruc.2017.09.024">https://doi.org/10.1016/j.molstruc.2017.09.024</a>                                        |

**Table S2.** Crystal data and structure refinement details for compounds **1-2**

|                                                     | <b>1</b>                                                            | <b>2</b>                                                            |
|-----------------------------------------------------|---------------------------------------------------------------------|---------------------------------------------------------------------|
| Empirical formula                                   | C <sub>102</sub> H <sub>205</sub> Co <sub>16</sub> NO <sub>66</sub> | C <sub>106</sub> H <sub>213</sub> Co <sub>16</sub> NO <sub>66</sub> |
| Formula weight / g mol <sup>-1</sup>                | 3444.54                                                             | 3500.64                                                             |
| Temperature / K                                     | 293(2)                                                              | 293(2)                                                              |
| Wavelength / Å                                      | 0.71073                                                             | 0.71073                                                             |
| Crystal system                                      | monoclinic                                                          | monoclinic                                                          |
| Space group                                         | <i>P2<sub>1</sub>/c</i>                                             | <i>P2<sub>1</sub>/c</i>                                             |
| Unit cell dimensions                                |                                                                     |                                                                     |
| <i>a</i> / Å                                        | 19.4844(5)                                                          | 19.5755(6)                                                          |
| <i>b</i> / Å                                        | 19.7970(6)                                                          | 19.8822(9)                                                          |
| <i>c</i> / Å                                        | 20.2908(10)                                                         | 20.6464(11)                                                         |
| $\alpha$ / °                                        | 90                                                                  | 90                                                                  |
| $\beta$ / °                                         | 93.527(3)                                                           | 94.644(3)                                                           |
| $\gamma$ / °                                        | 90                                                                  | 90                                                                  |
| Volume / Å <sup>3</sup>                             | 7812.0(5)                                                           | 8009.3(6)                                                           |
| <i>Z</i>                                            | 2                                                                   | 2                                                                   |
| Density (calculated) / Mg m <sup>-3</sup>           | 1.464                                                               | 1.452                                                               |
| Absorption coefficient / mm <sup>-1</sup>           | 1.731                                                               | 1.690                                                               |
| <i>F</i> (000)                                      | 3568                                                                | 3632                                                                |
| Crystal size / mm <sup>3</sup>                      | 0.30 × 0.20 × 0.10                                                  | 0.35 × 0.35 × 0.20                                                  |
| Theta range for data collection                     | 2.996 to 25.049                                                     | 2.943 to 25.249                                                     |
| Index ranges                                        | -20 ≤ <i>h</i> ≤ 23,<br>-21 ≤ <i>k</i> ≤ 23,<br>-14 ≤ <i>l</i> ≤ 24 | -22 ≤ <i>h</i> ≤ 23,<br>-23 ≤ <i>k</i> ≤ 14,<br>-16 ≤ <i>l</i> ≤ 24 |
| Reflections collected                               | 27514                                                               | 26859                                                               |
| Independent reflections                             | 13746 [ <i>R</i> <sub>int</sub> = 0.0525]                           | 14469 [ <i>R</i> <sub>int</sub> = 0.0464]                           |
| Completeness to theta = 25.049°                     | 99.2%                                                               | 99.7%                                                               |
| Data / restraints / parameters                      | 13746 / 801 / 1030                                                  | 14469 / 212 / 974                                                   |
| Goodness-of-fit on <i>F</i> <sup>2</sup>            | 1.000                                                               | 1.003                                                               |
| Final <i>R</i> indices [ <i>I</i> > 2σ( <i>I</i> )] | <i>R</i> <sub>1</sub> = 0.0630, <i>wR</i> <sub>2</sub> = 0.1209     | <i>R</i> <sub>1</sub> = 0.0733, <i>wR</i> <sub>2</sub> = 0.1782     |
| <i>R</i> indices (all data)                         | <i>R</i> <sub>1</sub> = 0.1348, <i>wR</i> <sub>2</sub> = 0.1436     | <i>R</i> <sub>1</sub> = 0.1414, <i>wR</i> <sub>2</sub> = 0.2143     |
| Largest diff. peak and hole / e·Å <sup>-3</sup>     | 0.755 and -0.473                                                    | 1.013 and -0.810                                                    |

**Table S3.** Selected bond distances (in Å) for **1-2**

| <b>1</b> |          |                      |          |
|----------|----------|----------------------|----------|
| Co1–O29  | 1.899(3) | Co5–O11              | 2.017(4) |
| Co1–O30  | 1.902(4) | Co5–O25              | 2.069(5) |
| Co1–O26  | 1.902(4) | Co5–O14              | 2.099(3) |
| Co1–O28  | 1.903(3) | Co5–O28              | 2.126(4) |
| Co1–O1   | 1.906(3) | Co5–O12              | 2.135(4) |
| Co1–O31  | 1.910(3) | Co5–O30              | 2.146(3) |
| Co2–O4   | 2.021(5) | Co6–O2               | 2.000(3) |
| Co2–O24  | 2.034(4) | Co6–O16              | 2.048(4) |
| Co2–O26  | 2.117(3) | Co6–O1               | 2.099(3) |
| Co2–O22  | 2.135(4) | Co6–O14              | 2.127(4) |
| Co2–O31  | 2.146(4) | Co6–O30              | 2.153(3) |
| Co2–O6   | 2.150(4) | Co6–O18              | 2.181(3) |
| Co3–O8   | 1.987(4) | Co7–O20              | 2.074(4) |
| Co3–O5   | 2.002(5) | Co7–O18              | 2.096(4) |
| Co3–O26  | 2.113(3) | Co7–O1               | 2.099(3) |
| Co3–O6   | 2.118(4) | Co7–O31              | 2.106(3) |
| Co3–O29  | 2.151(4) | Co7–O3               | 2.116(3) |
| Co3–O27  | 2.224(4) | Co7–O22              | 2.117(4) |
| Co4–O9   | 1.998(4) | Co8–O2 <sup>#1</sup> | 2.049(3) |
| Co4–O10  | 2.009(4) | Co8–O2               | 2.050(3) |
| Co4–O12  | 2.118(4) | Co8–O15              | 2.060(4) |
| Co4–O28  | 2.122(3) | Co8–O17              | 2.110(4) |
| Co4–O29  | 2.146(3) | Co8–O19              | 2.112(4) |
| Co4–O27  | 2.204(4) | Co8–O3               | 2.118(3) |
| <b>2</b> |          |                      |          |
| Co1–O26  | 1.899(4) | Co5–O11              | 2.015(5) |
| Co1–O28  | 1.903(4) | Co5–O25              | 2.054(5) |
| Co1–O30  | 1.907(4) | Co5–O14              | 2.102(4) |
| Co1–O31  | 1.907(4) | Co5–O28              | 2.119(4) |
| Co1–O29  | 1.913(4) | Co5–O12              | 2.127(4) |
| Co1–O1   | 1.920(4) | Co5–O29              | 2.152(4) |
| Co2–O24  | 2.033(5) | Co6–O2               | 2.008(4) |
| Co2–O4   | 2.037(5) | Co6–O16              | 2.056(5) |
| Co2–O26  | 2.116(4) | Co6–O1               | 2.099(4) |
| Co2–O22  | 2.127(4) | Co6–O14              | 2.121(4) |
| Co2–O31  | 2.145(4) | Co6–O29              | 2.156(4) |
| Co2–O6   | 2.153(5) | Co6–O18              | 2.176(4) |
| Co3–O5   | 1.996(6) | Co7–O20              | 2.074(4) |
| Co3–O8   | 2.011(5) | Co7–O18              | 2.081(4) |
| Co3–O6   | 2.114(5) | Co7–O1               | 2.095(4) |
| Co3–O26  | 2.117(4) | Co7–O22              | 2.105(5) |
| Co3–O30  | 2.141(4) | Co7–O31              | 2.107(4) |
| Co3–O27  | 2.226(5) | Co7–O3               | 2.115(4) |
| Co4–O9   | 1.994(5) | Co8–O2 <sup>#1</sup> | 2.044(4) |

|                                                                                      |          |                       |          |
|--------------------------------------------------------------------------------------|----------|-----------------------|----------|
| Co4–O10                                                                              | 2.015(5) | Co8–O2                | 2.055(3) |
| Co4–O28                                                                              | 2.104(4) | Co8–O15 <sup>#1</sup> | 2.067(5) |
| Co4–O12                                                                              | 2.120(5) | Co8–O17               | 2.108(5) |
| Co4–O30                                                                              | 2.144(4) | Co8–O19               | 2.109(5) |
| Co4–O27                                                                              | 2.201(5) | Co8–O3                | 2.118(4) |
| <i>Symmetry transformations used to generate equivalent atoms: #1 -x+1,-y+1,-z+1</i> |          |                       |          |

**Table S4.** Hydrogen bonds geometry (Å, deg) for **1-2**

| D–H···A                                                                              | d(D–H)    | d(H···A)  | d(D···A)  | <(DHA) |
|--------------------------------------------------------------------------------------|-----------|-----------|-----------|--------|
| <b>1</b>                                                                             |           |           |           |        |
| O1–H1...O32                                                                          | 0.83      | 2.04      | 2.796(6)  | 151.5  |
| O2–H2A...O32                                                                         | 0.83      | 2.27      | 3.029(7)  | 151.4  |
| O3–H3D...O23                                                                         | 0.85      | 1.83      | 2.577(6)  | 145.3  |
| O3–H3E...O21                                                                         | 0.85      | 1.78      | 2.558(6)  | 151.5  |
| O24–H24D...O7                                                                        | 0.842(19) | 1.88(3)   | 2.665(6)  | 154(4) |
| O24–H24E...O20                                                                       | 0.843(19) | 1.99(3)   | 2.754(5)  | 151(5) |
| O25–H25D...O16                                                                       | 0.854(19) | 2.04(2)   | 2.844(5)  | 155(3) |
| O25–H25E...O13                                                                       | 0.862(19) | 1.86(2)   | 2.677(6)  | 157(3) |
| O27–H27...O33                                                                        | 0.83      | 1.80      | 2.596(6)  | 161(5) |
| O32–H32H...O17                                                                       | 0.887(15) | 2.135(15) | 2.992(6)  | 162(2) |
| O32–H32J...N1                                                                        | 0.855(19) | 2.07(2)   | 2.819(16) | 146(5) |
| O33–H33A...O13 <sup>#2</sup>                                                         | 0.86(2)   | 1.99(3)   | 2.834(7)  | 165(8) |
| O33–H33B...O7 <sup>#3</sup>                                                          | 0.854(19) | 2.124(19) | 2.862(6)  | 145(4) |
| <b>2</b>                                                                             |           |           |           |        |
| O1–H1...O32                                                                          | 0.83      | 2.03      | 2.788(7)  | 151.1  |
| O2–H2A...O32                                                                         | 0.83      | 2.28      | 3.036(8)  | 150.8  |
| O3–H3D...O21                                                                         | 0.85      | 1.79      | 2.569(7)  | 151.3  |
| O3–H3E...O23                                                                         | 0.85      | 1.83      | 2.568(7)  | 144.2  |
| O24–H24D...O7                                                                        | 0.853(19) | 1.87(3)   | 2.671(7)  | 154(4) |
| O24–H24E...O20                                                                       | 0.841(19) | 1.97(3)   | 2.752(6)  | 151(5) |
| O25–H25D...O16                                                                       | 0.841(18) | 2.13(4)   | 2.823(6)  | 155(3) |
| O25–H25E...O13                                                                       | 0.841(19) | 1.95(4)   | 2.664(7)  | 157(3) |
| O27–H27...O33                                                                        | 0.83      | 1.83      | 2.618(6)  | 161(5) |
| O32–H32H...N1                                                                        | 0.864(18) | 2.110(19) | 2.940(15) | 162(2) |
| O32–H32J...O17                                                                       | 0.887(16) | 2.141(15) | 2.999(7)  | 146(5) |
| O33–H33A...O13 <sup>#2</sup>                                                         | 0.866(18) | 2.118(19) | 2.934(8)  | 165(8) |
| O33–H33B...O7 <sup>#3</sup>                                                          | 0.857(18) | 2.109(18) | 2.934(8)  | 145(4) |
| <i>Symmetry transformations used to generate equivalent atoms: #1 -x+1,-y+1,-z+1</i> |           |           |           |        |
| <i>#2 x,-y+3/2,z+1/2 #3 -x+2,y+1/2,-z+3/2</i>                                        |           |           |           |        |

**Table S5.** BVS calculations for Co atoms in **1–2**

| Atom       | BVS value* |          |          | Oxidation state |
|------------|------------|----------|----------|-----------------|
|            | <i>a</i>   | <i>b</i> | <i>c</i> |                 |
| <b>1</b>   |            |          |          |                 |
| <b>Co1</b> | 2.91       | 3.46     | 3.11     | <b>+3</b>       |
| <b>Co2</b> | 2.02       | 1.99     | 1.86     | <b>+2</b>       |
| <b>Co3</b> | 2.03       | 2.00     | 1.87     | <b>+2</b>       |
| <b>Co4</b> | 2.04       | 2.01     | 1.88     | <b>+2</b>       |
| <b>Co5</b> | 2.04       | 2.01     | 1.88     | <b>+2</b>       |
| <b>Co6</b> | 2.01       | 1.98     | 1.85     | <b>+2</b>       |
| <b>Co7</b> | 1.98       | 1.95     | 1.82     | <b>+2</b>       |
| <b>Co8</b> | 2.08       | 2.05     | 1.91     | <b>+2</b>       |
| <b>2</b>   |            |          |          |                 |
| <b>Co1</b> | 2.88       | 3.41     | 3.08     | <b>+3</b>       |
| <b>Co2</b> | 2.00       | 1.97     | 1.84     | <b>+2</b>       |
| <b>Co3</b> | 2.03       | 2.00     | 1.87     | <b>+2</b>       |
| <b>Co4</b> | 2.05       | 2.02     | 1.88     | <b>+2</b>       |
| <b>Co5</b> | 2.04       | 2.01     | 1.87     | <b>+2</b>       |
| <b>Co6</b> | 2.00       | 1.97     | 1.84     | <b>+2</b>       |
| <b>Co7</b> | 2.01       | 1.98     | 1.85     | <b>+2</b>       |
| <b>Co8</b> | 2.09       | 1.92     | 1.92     | <b>+2</b>       |

\*Values of  $R_0$  for Co–O bonds for oxidation states +3  $R_0 = 1.637(a [1])$  and  $1.70 (b [2])$  and +2  $R_0 = 1.691(a [1])$  and  $1.685 (b [2])$ .  $R_0 = 1.661$  for oxidation states of Co(II) and Co(III) ( $c [1]$ )

[1] Wood, R. M.; Palenik, G. J. Bond Valence Sums in Coordination Chemistry. A Simple Method for Calculating the Oxidation State of Cobalt in Complexes Containing Only Co-O Bonds. *Inorg. Chem.* **1998**, *37*, 4149-4151.

[2] Brese, N. E.; O’Keeffe, M. Bond-valence parameters for solids. *Acta Crystallogr., Sect. B* **1991**, *B47*, 192-197.



**Table S6.** Hirshfeld surfaces for the Co(II) and Co(III) centers in **1**

| HS         | Co(III)                                                                             | Co(II)                                                                              |                                                                                     |                                                                                      |                                                                                       |                                                                                       |                                                                                       |                                                                                       |
|------------|-------------------------------------------------------------------------------------|-------------------------------------------------------------------------------------|-------------------------------------------------------------------------------------|--------------------------------------------------------------------------------------|---------------------------------------------------------------------------------------|---------------------------------------------------------------------------------------|---------------------------------------------------------------------------------------|---------------------------------------------------------------------------------------|
|            | Co1                                                                                 | Co2                                                                                 | Co3                                                                                 | Co4                                                                                  | Co5                                                                                   | Co6                                                                                   | Co7                                                                                   | Co8                                                                                   |
| $d_i$      | 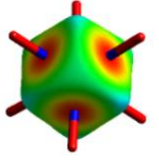   |    |    |    |    |    |    |    |
| $d_e$      |    |    |    |    |    |    |    |    |
| $d_{norm}$ |    |    |    |    |    |    |    |    |
| Shape      |   |   |   |   |   |   |   |   |
| Curvedness |  |  |  |  |  |  |  |  |

**Table S7.** Hirshfeld surfaces for the Co(II) and Co(III) centers in **2**

| HS         | Co(III)                                                                             | Co(II)                                                                              |                                                                                     |                                                                                      |                                                                                       |                                                                                       |                                                                                       |                                                                                       |
|------------|-------------------------------------------------------------------------------------|-------------------------------------------------------------------------------------|-------------------------------------------------------------------------------------|--------------------------------------------------------------------------------------|---------------------------------------------------------------------------------------|---------------------------------------------------------------------------------------|---------------------------------------------------------------------------------------|---------------------------------------------------------------------------------------|
|            | Co1                                                                                 | Co2                                                                                 | Co3                                                                                 | Co4                                                                                  | Co5                                                                                   | Co6                                                                                   | Co7                                                                                   | Co8                                                                                   |
| $d_i$      | 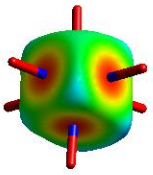   |    |    |    |    |    |    |    |
| $d_e$      |    |    |    |    |    |    |    |    |
| $d_{norm}$ |    |    |    |    |    |    |    |    |
| Shape      |   |   |   |   |   |   |   |   |
| Curvedness |  |  |  |  |  |  |  |  |

**Table S8.** Quantitative data from Hirshfeld surface of the Co(II) and Co(III) centers in **1-2**

| Co centers                      | Volume / Å <sup>3</sup> | Area / Å <sup>2</sup> | Globularity | Asphericity |
|---------------------------------|-------------------------|-----------------------|-------------|-------------|
| <b>1</b>                        |                         |                       |             |             |
| <b>Co1</b> (Co <sup>III</sup> ) | 7.13                    | 20.05                 | 0.894       | 0.006       |
| <b>Co2</b> (Co <sup>II</sup> )  | 12.44                   | 32.83                 | 0.791       | 0.038       |
| <b>Co3</b> (Co <sup>II</sup> )  | 13.20                   | 35.10                 | 0.770       | 0.103       |
| <b>Co4</b> (Co <sup>II</sup> )  | 12.80                   | 34.32                 | 0.771       | 0.055       |
| <b>Co5</b> (Co <sup>II</sup> )  | 12.83                   | 35.16                 | 0.754       | 0.089       |
| <b>Co6</b> (Co <sup>II</sup> )  | 11.23                   | 28.76                 | 0.843       | 0.019       |
| <b>Co7</b> (Co <sup>II</sup> )  | 11.63                   | 29.82                 | 0.833       | 0.022       |
| <b>Co8</b> (Co <sup>II</sup> )  | 11.66                   | 31.37                 | 0.793       | 0.005       |
| <b>2</b>                        |                         |                       |             |             |
| <b>Co1</b> (Co <sup>III</sup> ) | 7.16                    | 20.08                 | 0.895       | 0.006       |
| <b>Co2</b> (Co <sup>II</sup> )  | 12.62                   | 33.10                 | 0.792       | 0.036       |
| <b>Co3</b> (Co <sup>II</sup> )  | 13.40                   | 35.96                 | 0.759       | 0.128       |
| <b>Co4</b> (Co <sup>II</sup> )  | 13.60                   | 37.18                 | 0.741       | 0.097       |
| <b>Co5</b> (Co <sup>II</sup> )  | 12.34                   | 32.88                 | 0.786       | 0.036       |
| <b>Co6</b> (Co <sup>II</sup> )  | 11.10                   | 28.26                 | 0.851       | 0.011       |
| <b>Co7</b> (Co <sup>II</sup> )  | 11.64                   | 29.94                 | 0.830       | 0.016       |
| <b>Co8</b> (Co <sup>II</sup> )  | 11.65                   | 31.27                 | 0.795       | 0.005       |

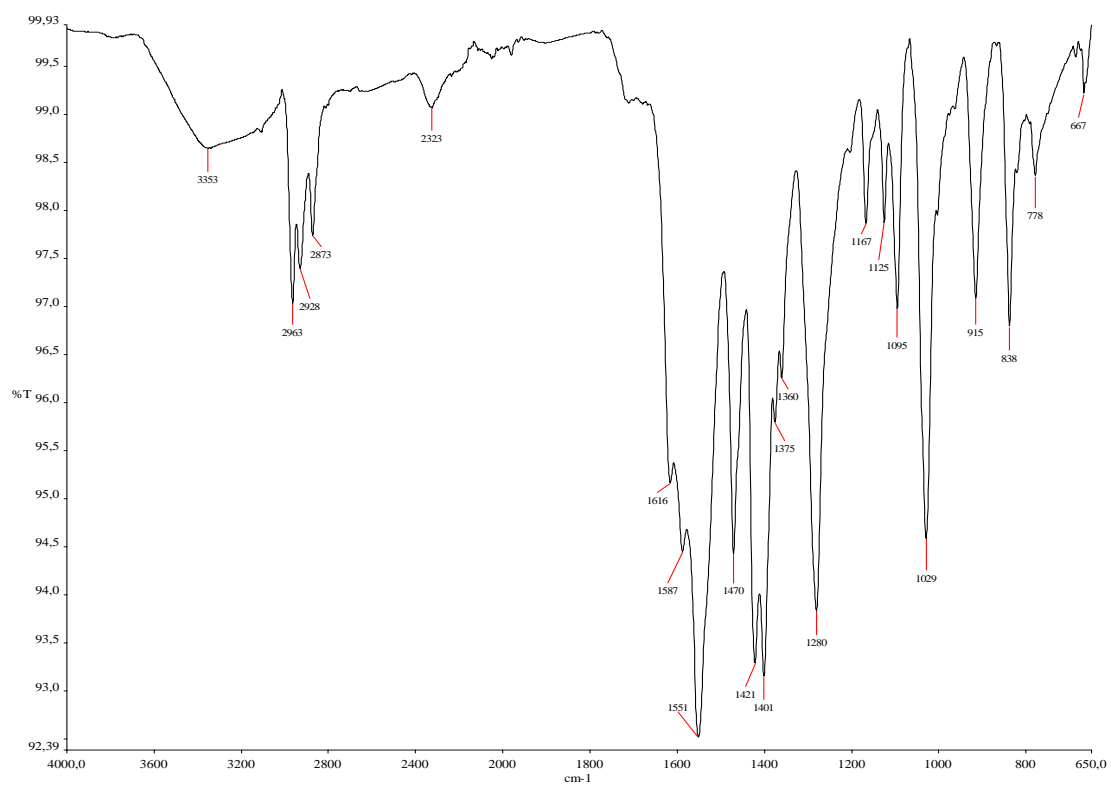

**Figure S1.** IR spectrum of 1.

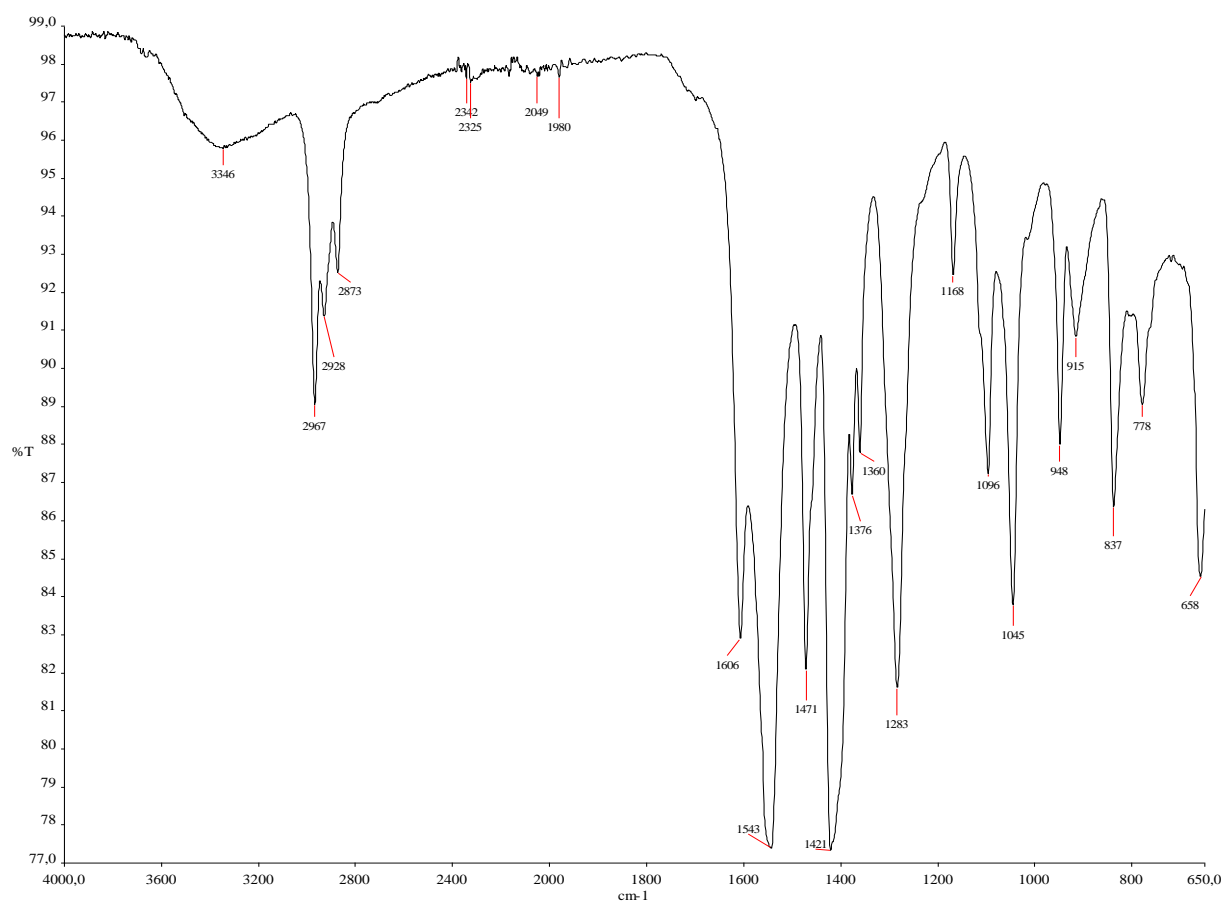

**Figure S2.** IR spectrum of 2.

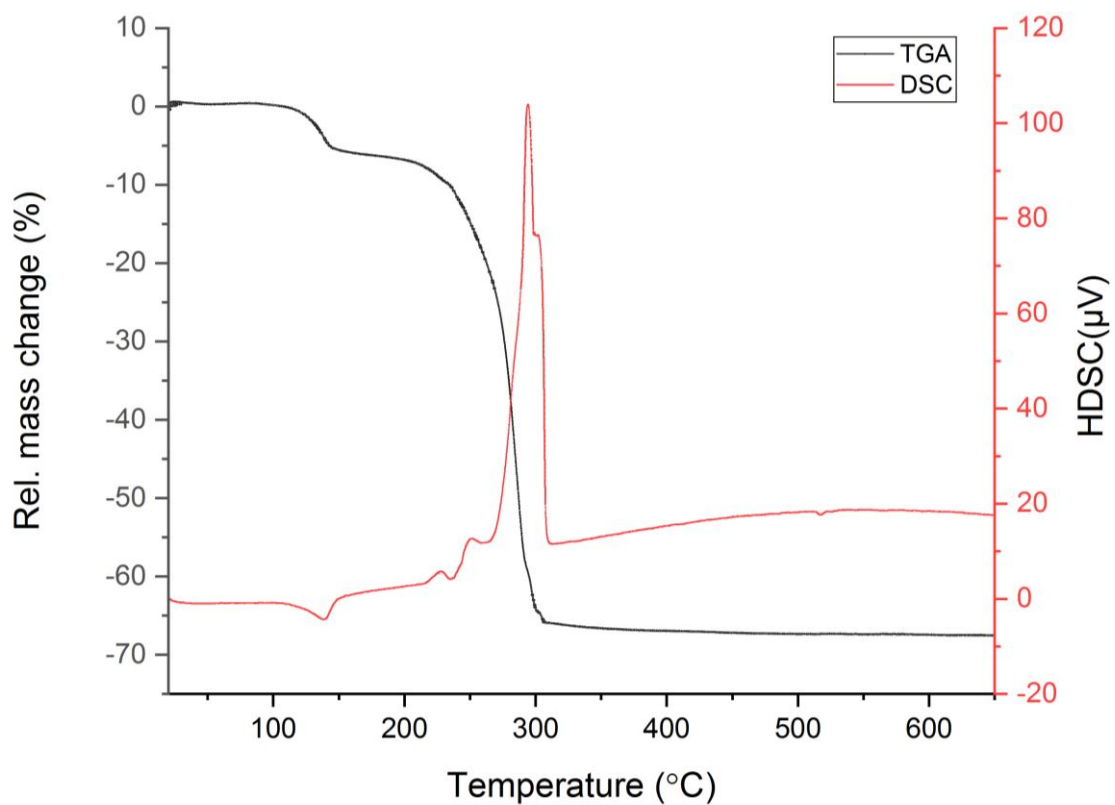

**Figure S3.** TGA/DSC curves for **1**.

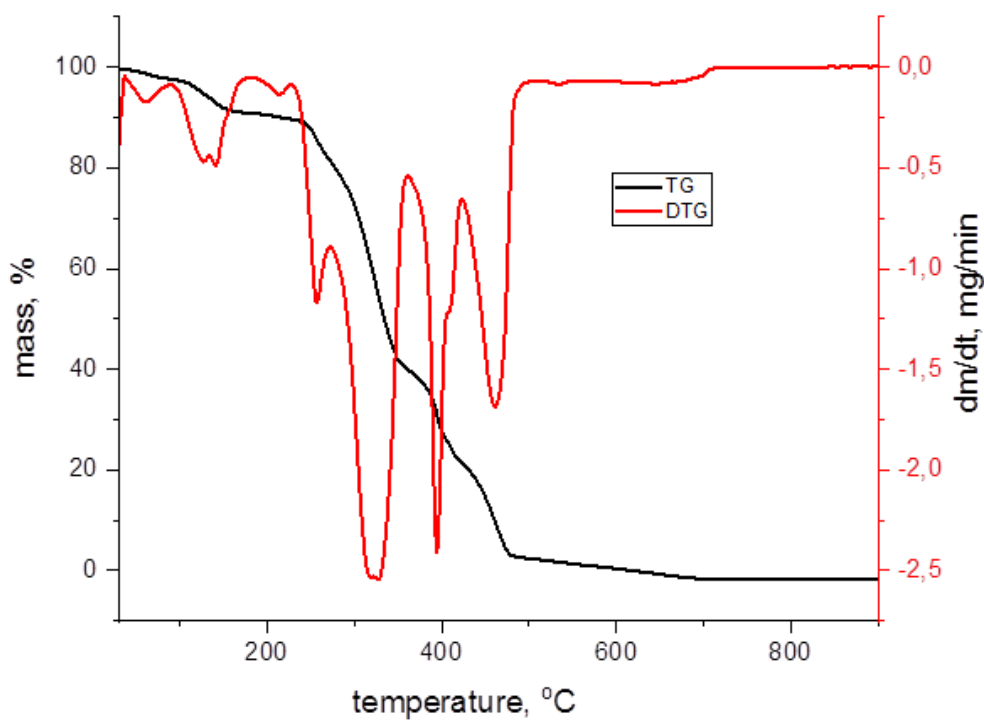

**Figure S4.** TG/DTG curves for **2**.

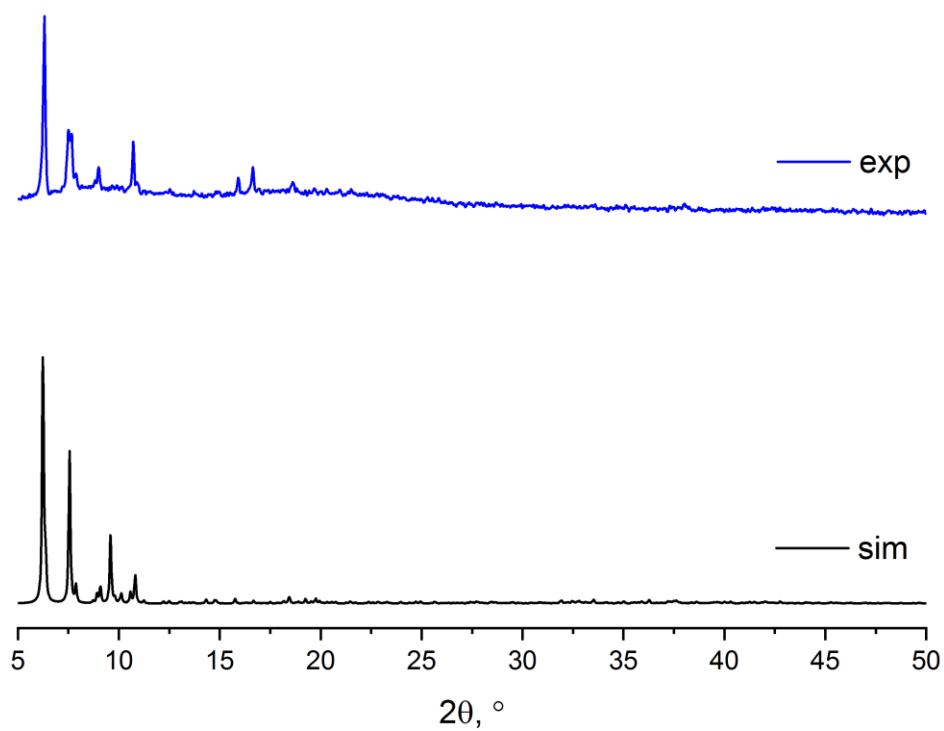

**Figure S5.** PXRD analysis of **1**.

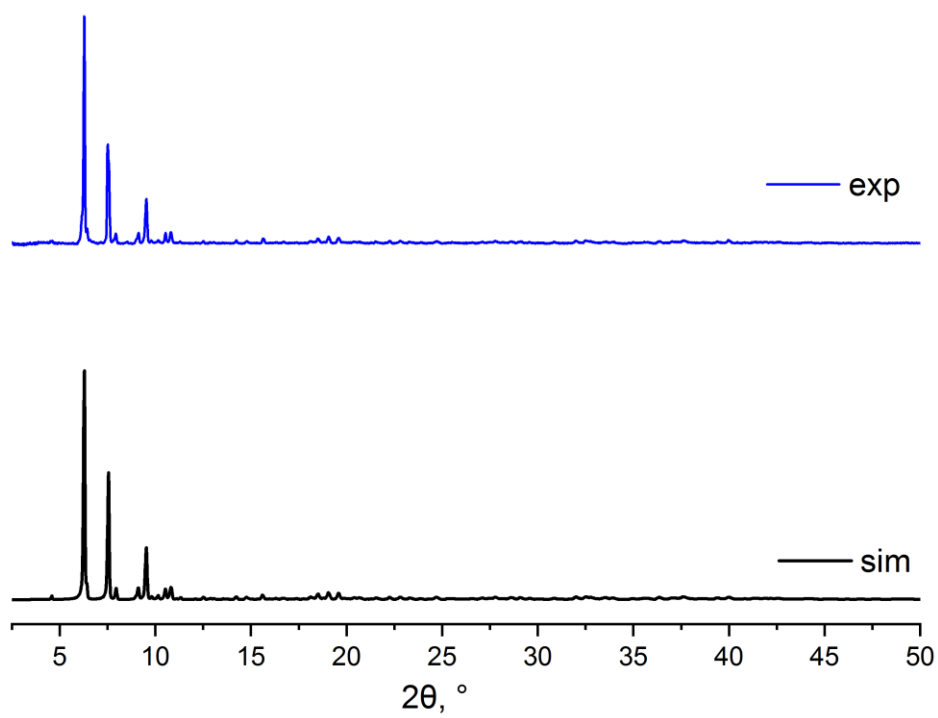

**Figure S6.** PXRD analysis of **2**.

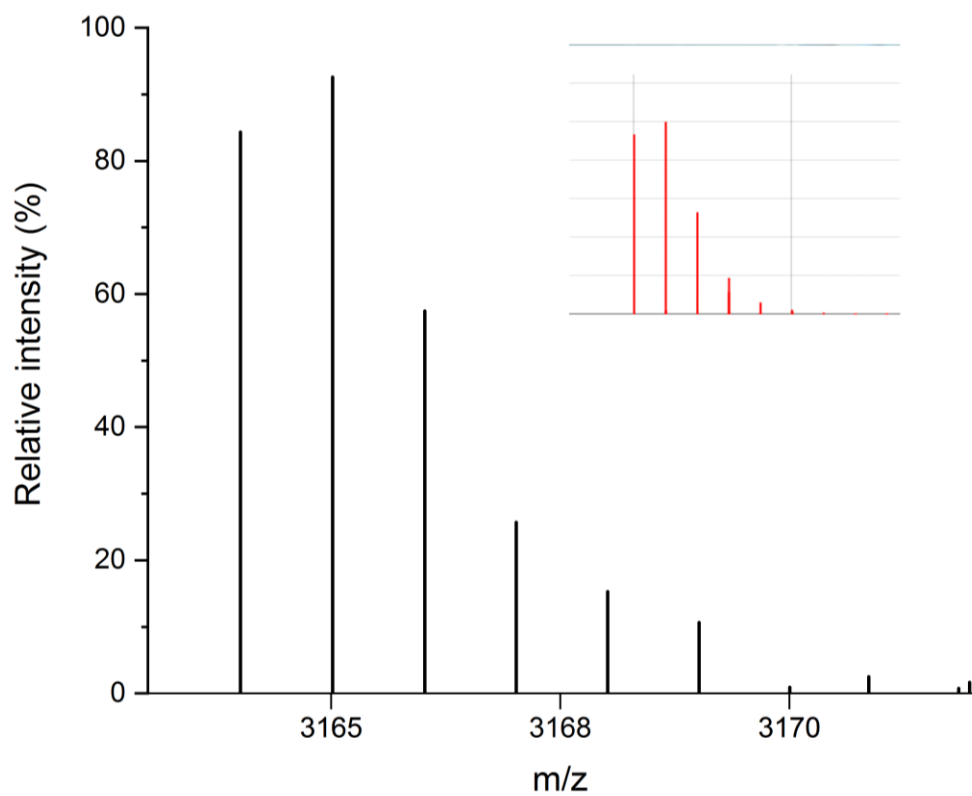

**Figure S7.** Experimental and simulated (insert) isotope patterns for the anionic fragment:  $[\text{Co}^{\text{II}}_{14}\text{Co}^{\text{III}}_2\text{O}_2(\text{OH})_2(\text{ib})_{19}(\text{thme})_2(\text{Hthme})_2(\text{MeOH})]^-$  ( $m/z$  3165.01, 100%) in **1**.

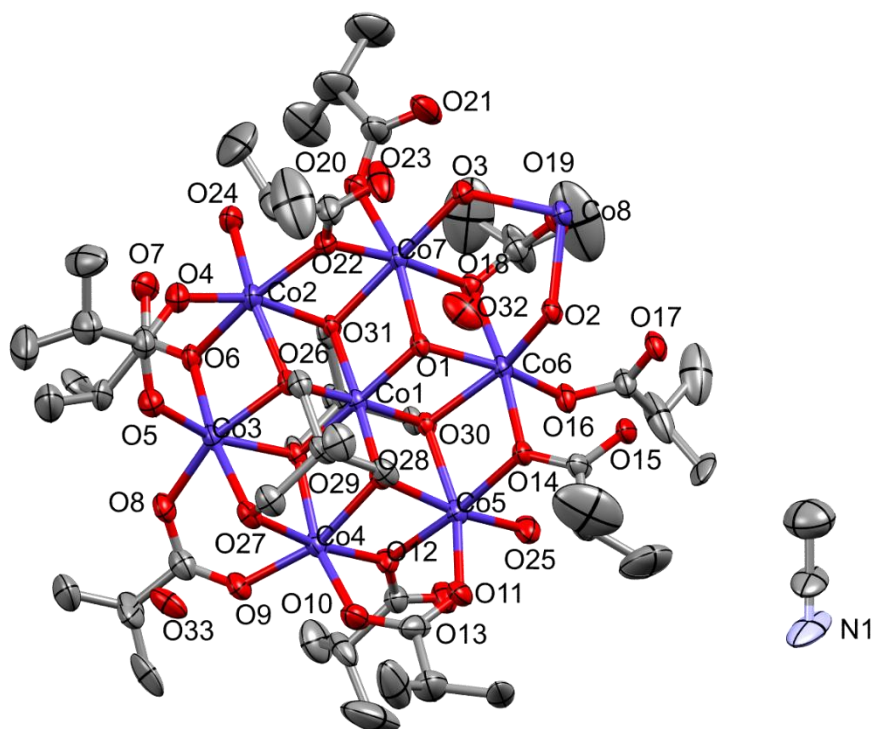

**Figure 8.** Asymmetric unit of nanocluster **1**, with a partial atom labeling and displacement ellipsoids drawn at the 30% probability level. Hydrogen atoms are omitted for clarity.

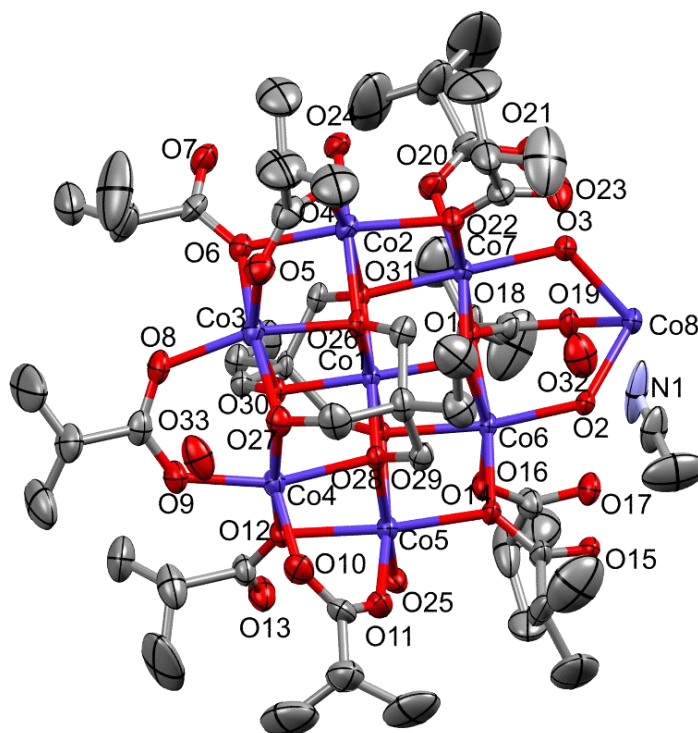

**Figure S9.** Asymmetric unit of nanocluster **2**, with a partial atom labeling and displacement ellipsoids drawn at the 30% probability level. Hydrogen atoms are omitted for clarity.



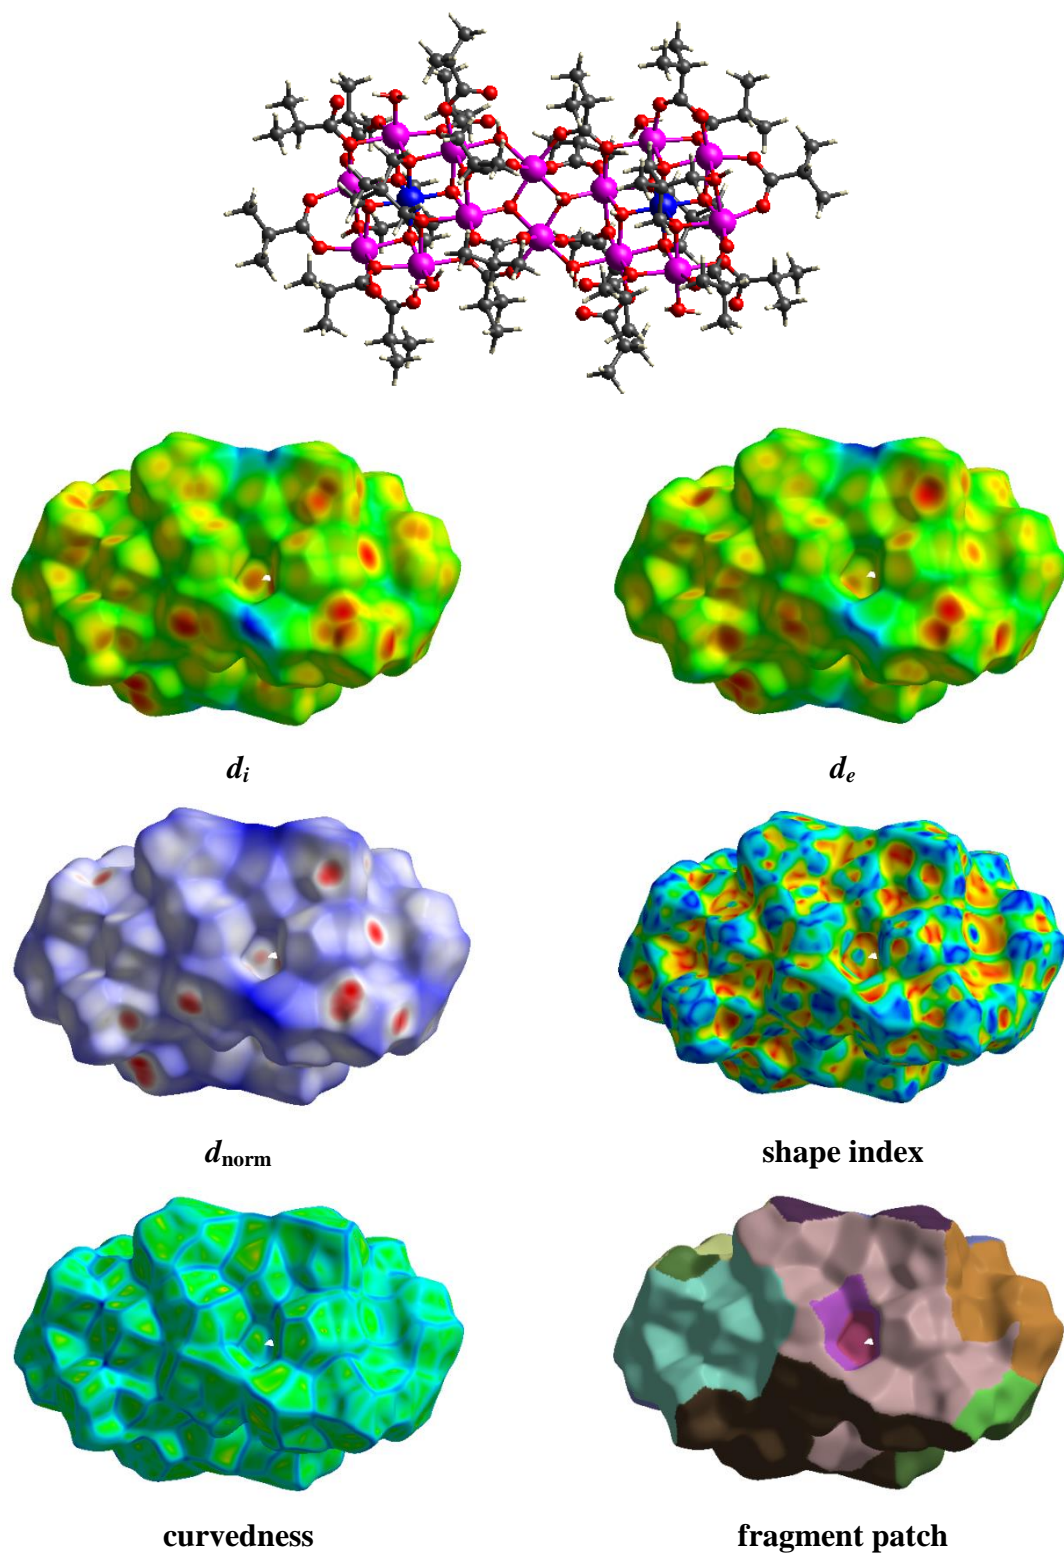

**Figure S10.** View of the Hirshfeld surface for  $[\text{Co}_{16}(\text{OH})_4(\text{ib})_{20}(\text{thme})_2(\text{Hthme})_2(\text{H}_2\text{O})_6]$  cluster in 1 colour-coded with different properties.

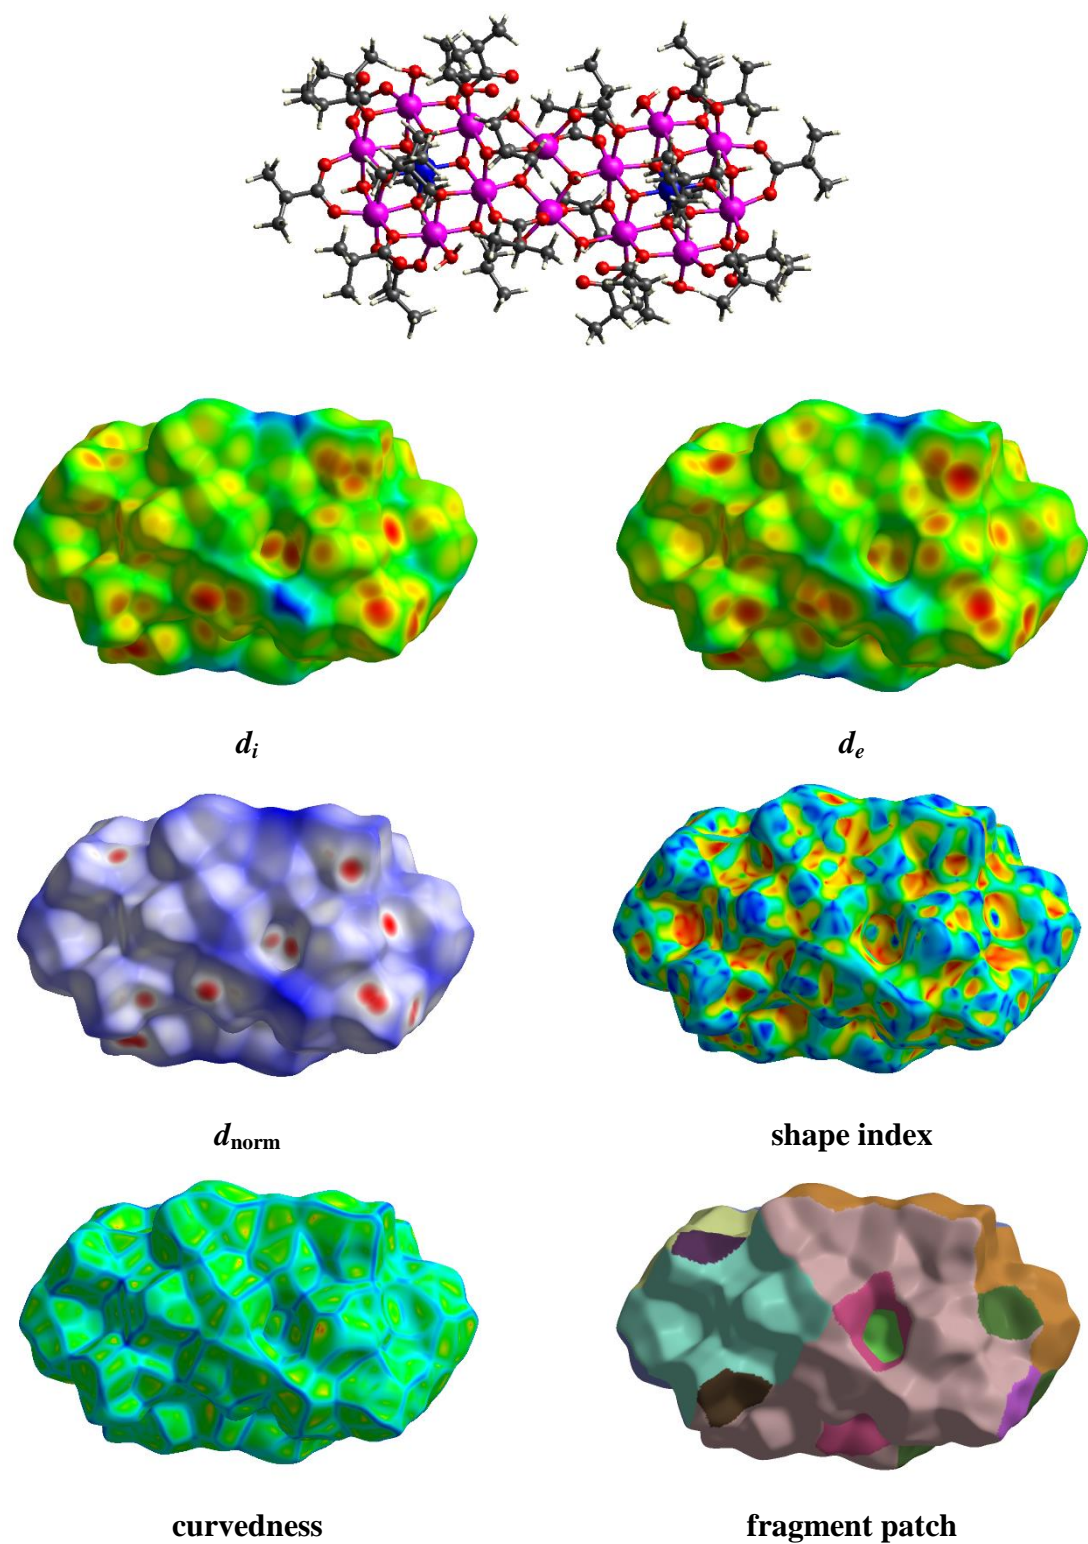

**Figure S11.** View of the Hirshfeld surface for  $[\text{Co}_{16}(\text{OH})_4(\text{ib})_{20}(\text{thmp})_2(\text{Hthmp})_2(\text{H}_2\text{O})_6]$  cluster in 2 colour-coded with different properties.

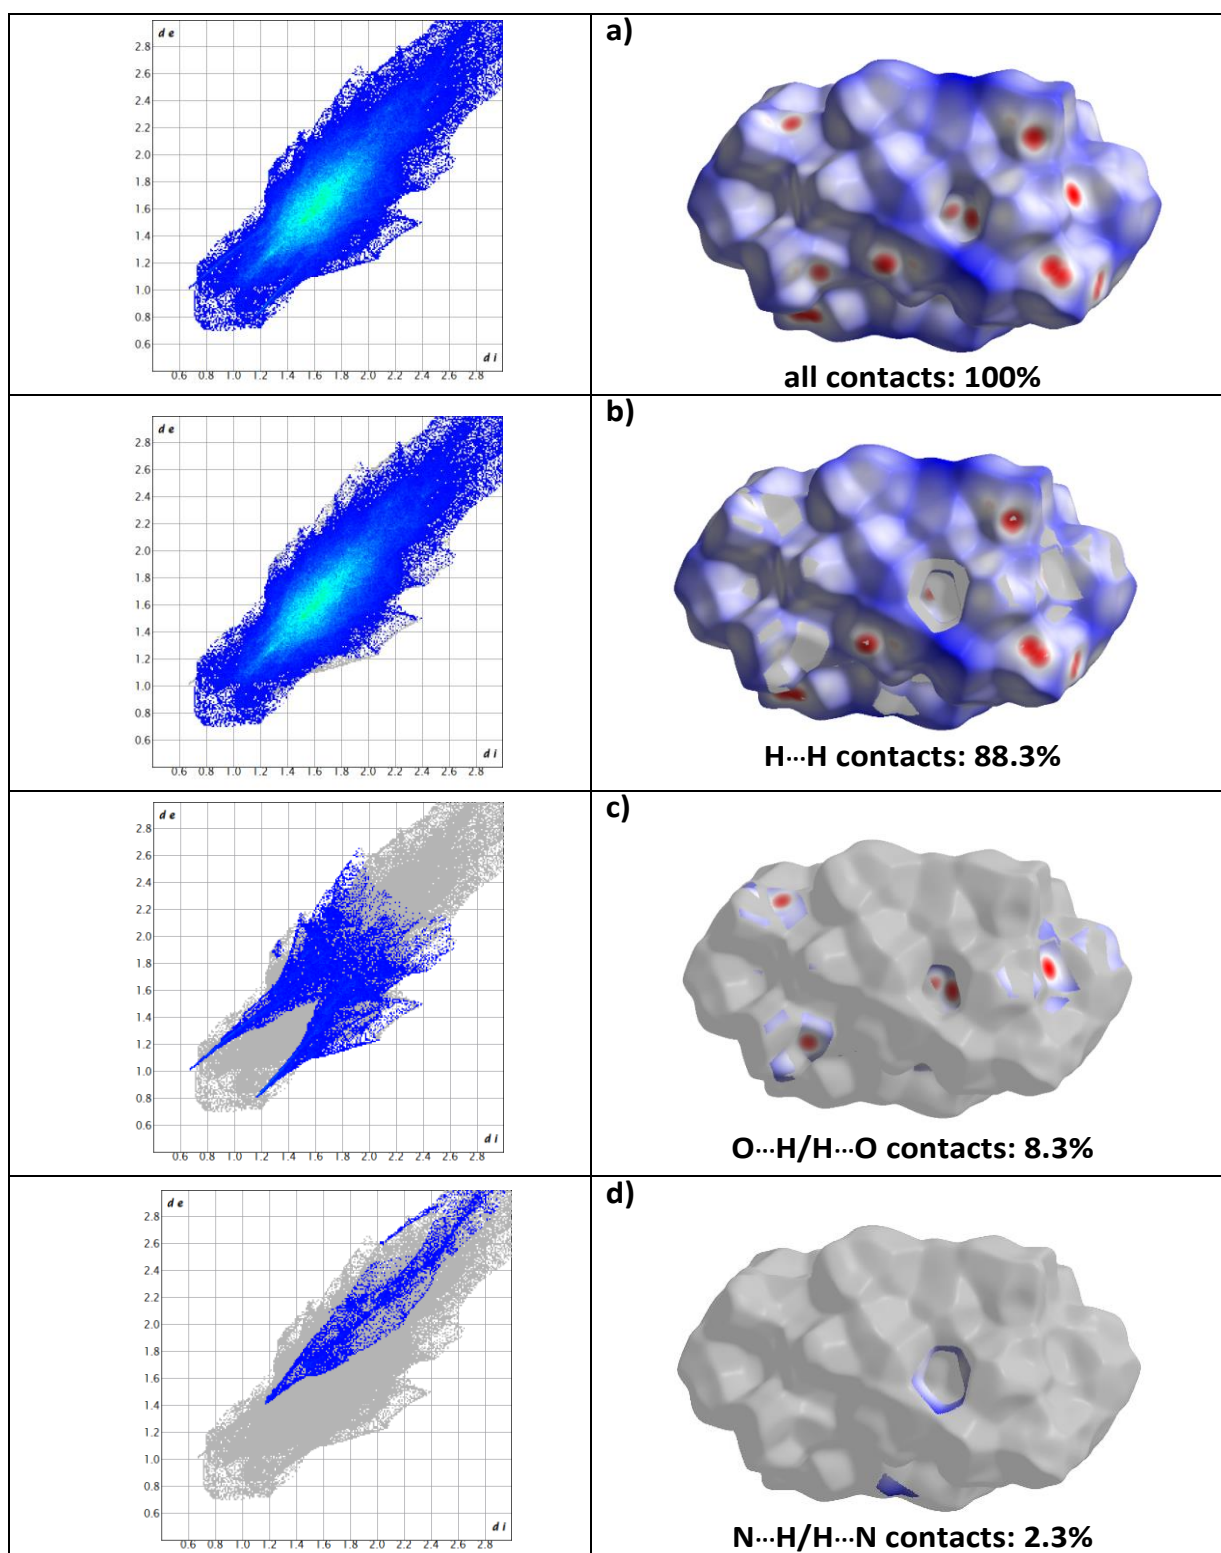

**Figure S12.** 2D fingerprint plots ( $d_e$  vs.  $d_i$ ) and  $d_{\text{norm}}$  surface plots of the  $\{\text{Co}_{16}\}$  cluster in **2**. Short contacts are represented by red areas, long contacts by blue areas, and the white area represents contacts with lengths equivalent to the sum of the van der Waal radii of the interacting atoms. a)  $d_{\text{norm}}$  distribution of all interactions, b) H...H, c) O...H/H...O, and d) N...H/H...N contacts. Surfaces to the right highlight the relevant  $d_{\text{norm}}$  surface patches associated with the specific contacts. The percentage of contribution is specified for each contact.

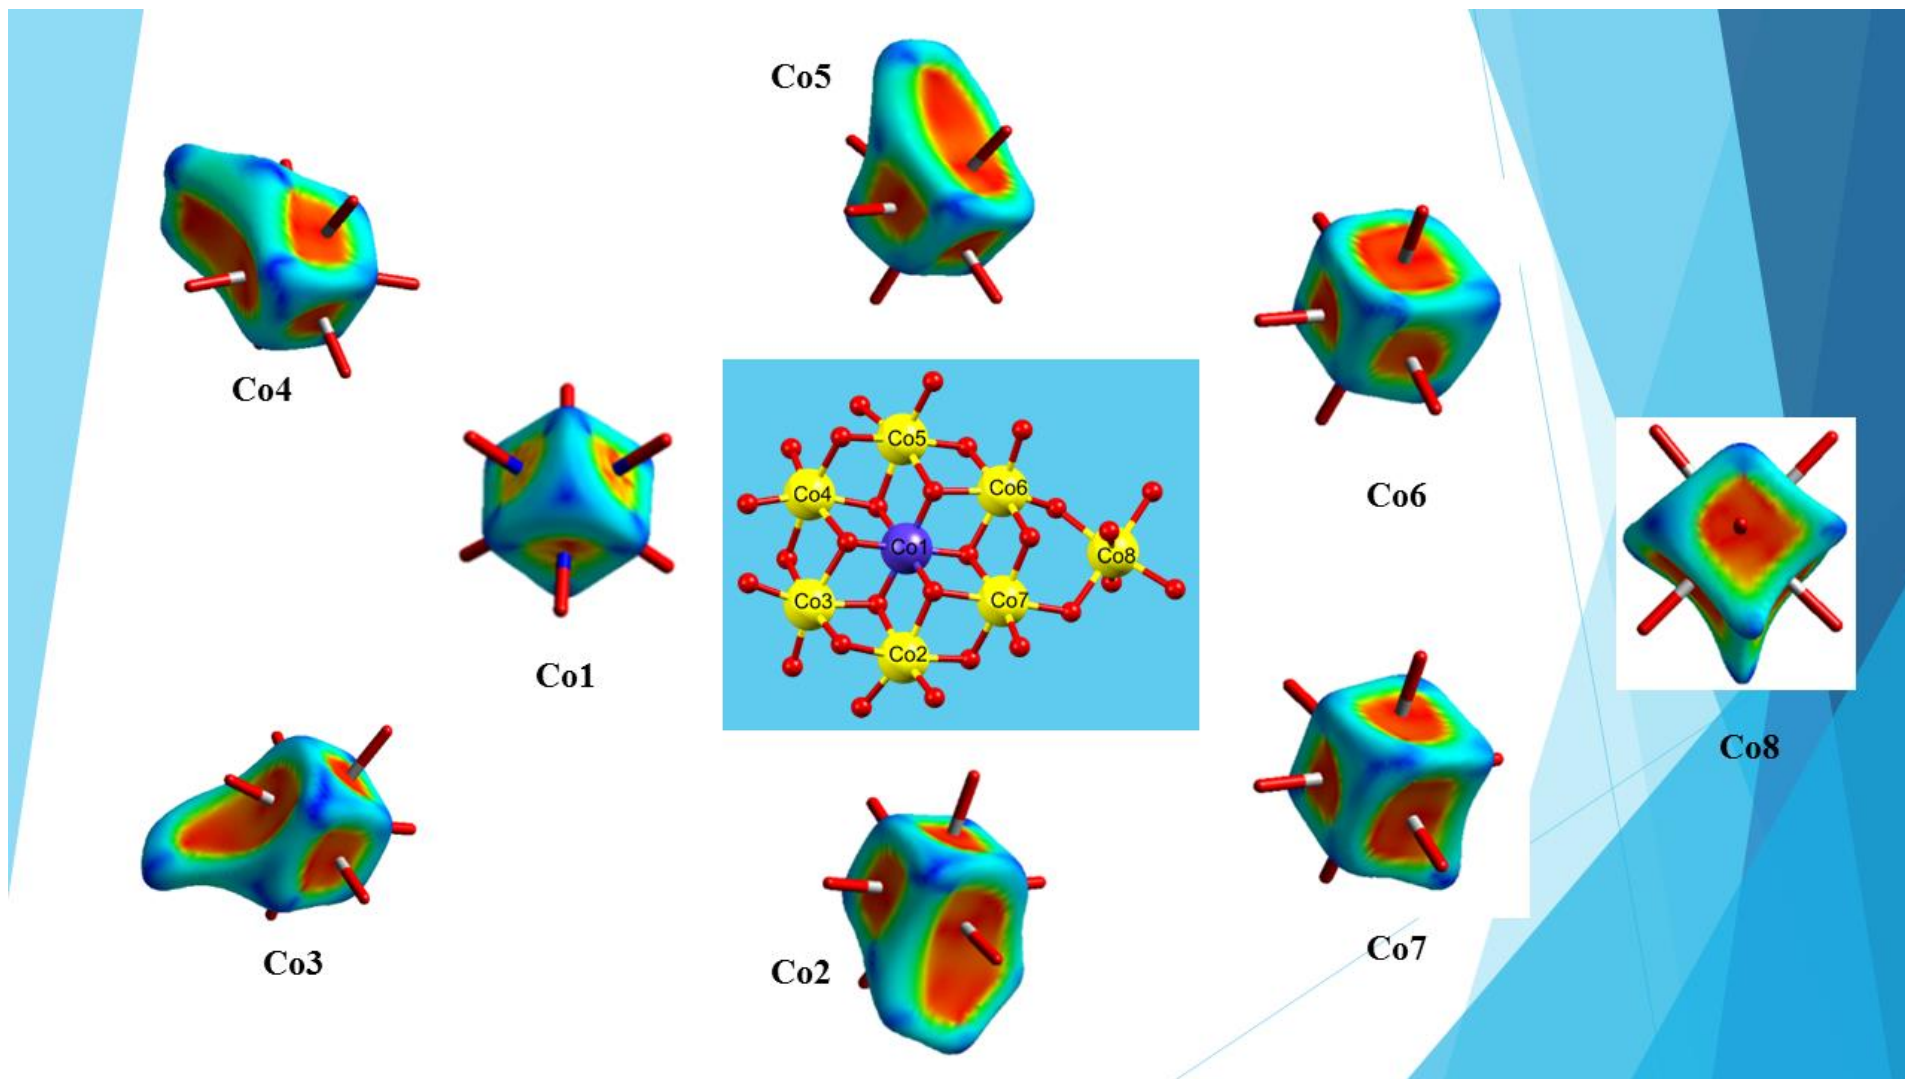

**Figure S13.** Hirshfeld surfaces for the Co(III) and Co(II) centres presenting different shapes in **1**.

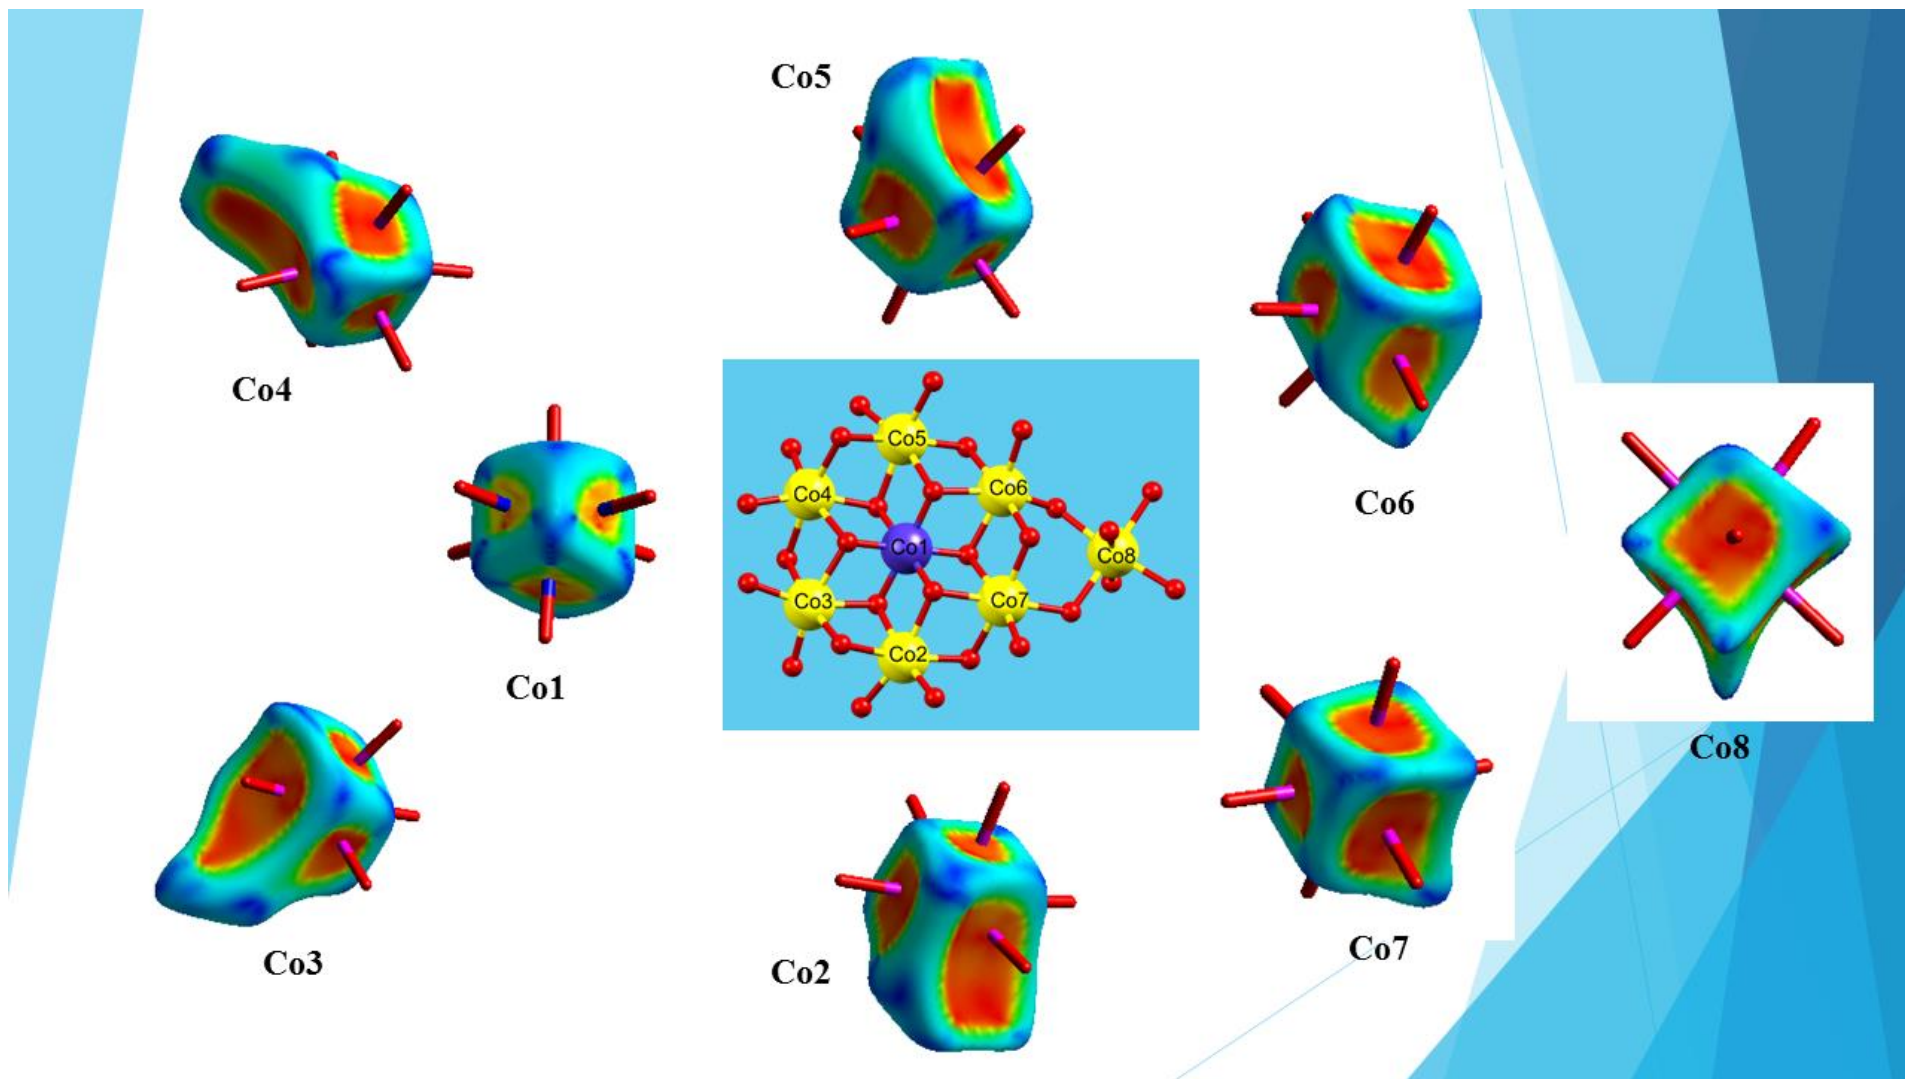

**Figure S14.** Hirshfeld surfaces for the Co(III) and Co(II) centres presenting different shapes in **2**.
